# Supplementary material for: A novel one-dimensional chain built of vanadyl ions and pyrazine-2,5-dicarboxylate
Source: Royal Society of Chemistry journal article supplement (doi:10.1039/c5dt01628b), 2015-01-01
Supplement: c5dt01628b1.pdf [file c5dt01628b1.pdf]

## 1D magnetic chain built from vanadyl ions and pyrazine-2,5-dicarboxylate

Marianne Lankelma,<sup>†</sup> Jeroen de Boer,<sup>†</sup> Marilena Ferbinteanu,<sup>‡</sup> Fanica Cimpoesu,<sup>‡</sup>  
André Luis Dantas Ramos,<sup>†,§</sup> Radu Tanasa,<sup>§</sup> Gadi Rothenberg,<sup>†</sup> and Stefania Tanase<sup>\*,†</sup>

<sup>†</sup>Van 't Hoff Institute for Molecular Sciences, University of Amsterdam, Science Park 904, 1098 XH Amsterdam, The Netherlands. E-mail: [s.grecea@uva.nl](mailto:s.grecea@uva.nl).

<sup>‡</sup>Faculty of Chemistry, Inorganic Chemistry Department, University of Bucharest, Dumbrava Rosie 23, Bucharest 020462, Romania

<sup>§</sup>Department of Physics & CARPATH, "Alexandru Ioan Cuza" University of Iasi, Boulevard Carol I, no. 11, Iasi 700506, Romania

<sup>ξ</sup> Environmental Engineering Department, Federal University of Sergipe (UFS), Aracaju-SE, Brazil

### Supplementary Material

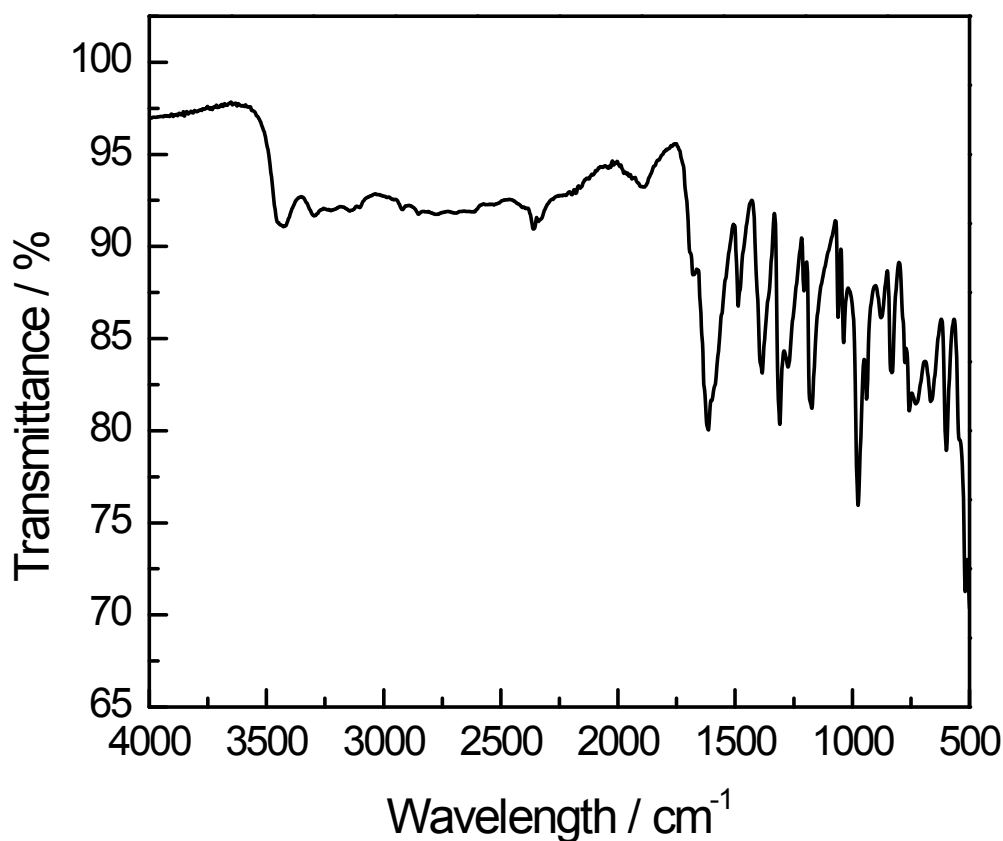

Figure S1. IR spectrum of  $\{[\text{VO}(\text{pzdc})(\text{H}_2\text{O})_2] \cdot \text{H}_2\text{O}\}_n$ .

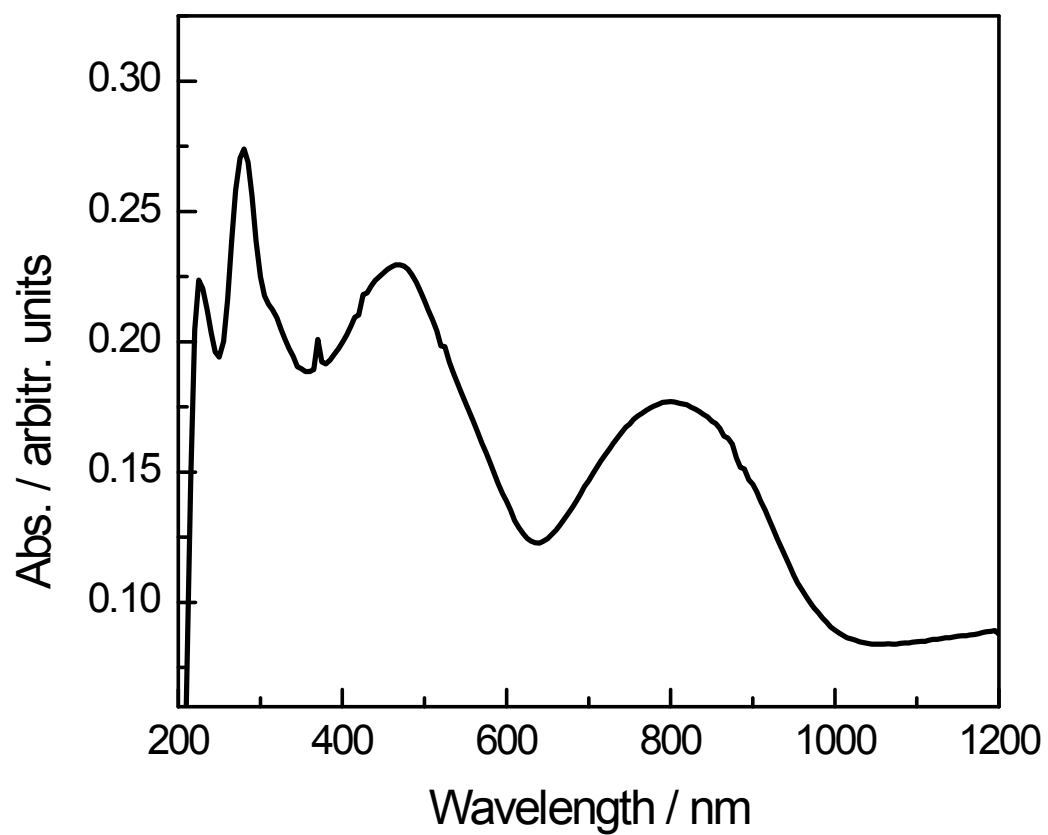

Figure S2. The UV-Vis spectrum of  $\{[\text{VO}(\text{pzdc})(\text{H}_2\text{O})_2] \cdot \text{H}_2\text{O}\}_n$ .

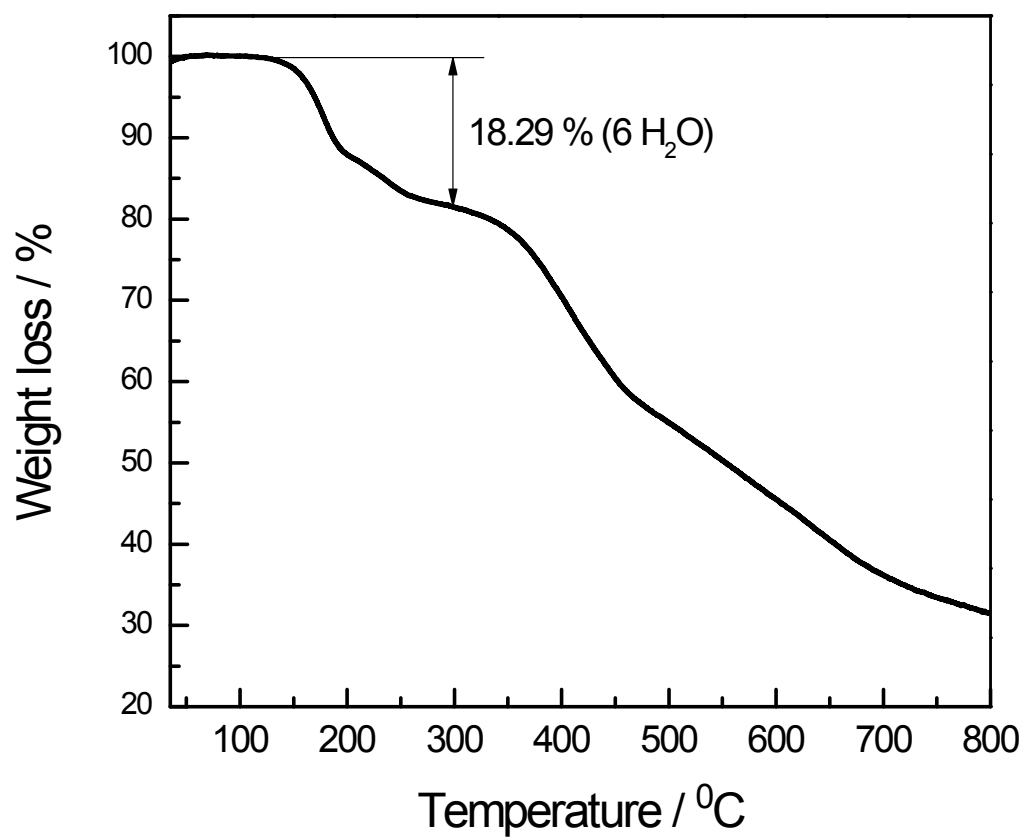

Figure S3. The TGA curve of  $\{[\text{VO}(\text{pzdc})(\text{H}_2\text{O})_2] \cdot \text{H}_2\text{O}\}_n$  recorded at 5 °C/min and in argon atmosphere

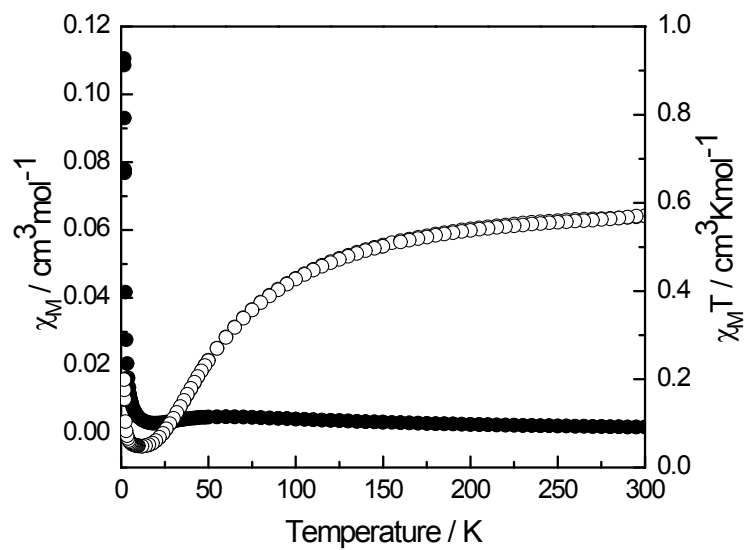

Figure S4. Temperature dependence of the magnetic susceptibility of  $\{[\text{VO}(\text{pzdc})(\text{H}_2\text{O})_2] \cdot \text{H}_2\text{O}\}_n$ :  $\chi_M$  vs T (●) and  $\chi_M T$  vs T (○).

Table S1. Crystal data for compound  $\{[\text{VO}(\text{pzdc})(\text{H}_2\text{O})_2] \cdot \text{H}_2\text{O}\}_{2n}$ 

|                                       |                                                                                                                                                              |
|---------------------------------------|--------------------------------------------------------------------------------------------------------------------------------------------------------------|
| Empirical Formula                     | $\text{C}_{12}\text{H}_{16}\text{N}_4\text{O}_{16}\text{V}_2$                                                                                                |
| Formula Weight                        | 574.16                                                                                                                                                       |
| Crystal Color, Habit                  | Red brown, block                                                                                                                                             |
| Crystal Dimensions                    | 5.000 × 0.050 × 0.050 mm                                                                                                                                     |
| No. of Reflections Used for Unit      | 5180                                                                                                                                                         |
| Cell Determination (2 $\theta$ range) | 6.0 - 55.0°                                                                                                                                                  |
| Omega Scan Peak Width at Half-height  | 0.00°                                                                                                                                                        |
| Lattice Parameters                    | a = 6.7612(8) Å<br>b = 8.792(1) Å<br>c = 9.346(2) Å<br>$\alpha$ = 65.850(5)°<br>$\beta$ = 87.775(6)°<br>$\gamma$ = 84.909(6)°<br>V = 504.9(1) Å <sup>3</sup> |
| Space Group                           | P-1 (#2)                                                                                                                                                     |
| Z value                               | 1                                                                                                                                                            |
| Space Group                           | P-1 (#2)                                                                                                                                                     |
| D <sub>calc</sub>                     | 1.888 g/cm <sup>3</sup>                                                                                                                                      |
| F <sub>000</sub>                      | 290.00                                                                                                                                                       |
| $\mu(\text{MoK}_\alpha)$              | 10.187 cm <sup>-1</sup>                                                                                                                                      |
| D <sub>calc</sub>                     | 1.888 g/cm <sup>3</sup>                                                                                                                                      |

Table S2. Bond lengths (Å) and angles (°) of the hydrogen bonding

| Donor – H – Acceptor |    |    | D...A    | D - H | H...A   | D - H... |
|----------------------|----|----|----------|-------|---------|----------|
| O1                   | H4 | O7 | 2.700(3) | 0.81  | 1.89(4) | 178(4)   |
| O1                   | H5 | O8 | 2.569(4) | 0.72  | 1.88(5) | 159(4)   |
| O3                   | H7 | O2 | 2.935(3) | 0.66  | 2.51(5) | 124(4)   |
| O3                   | H7 | O7 | 2.833(3) | 0.66  | 2.22(5) | 156(4)   |
| O3                   | H8 | O5 | 2.660(3) | 0.78  | 1.88(5) | 177(3)   |
| O8                   | H1 | N2 | 2.875(3) | 0.90  | 1.98(5) | 170(5)   |
| O8                   | H2 | O4 | 2.866(3) | 0.88  | 2.02(5) | 161(4)   |
